# Supplementary material
Source: publisher site journal article supplement (https://www.degruyterbrill.com/publication/isbn/9783805913089/downloadAsset/9783805913089_Inhaltsverzeichnis.pdf)
Supplement: Supplementary file 1 [file 9783805913089_Inhaltsverzeichnis.pdf]

# Inhaltsübersicht

|                                                                                        | Seite * |
|----------------------------------------------------------------------------------------|---------|
| Vorwort .....                                                                          | IX      |
| Allgemeines Schrifttum .....                                                           | XI      |
| Buch 5 · Erbrecht                                                                      |         |
| Abschnitt 2 · Rechtliche Stellung des Erben                                            |         |
| Titel 2 · Haftung des Erben für die Nachlassverbindlichkeiten .....                    | 1       |
| Untertitel 1 · Nachlassverbindlichkeiten .....                                         | 65      |
| Untertitel 2 · Aufgebot der Nachlassgläubiger .....                                    | 167     |
| Untertitel 3 · Beschränkung der Haftung des Erben .....                                | 214     |
| Untertitel 4 · Inventarerrichtung, unbeschränkte Haftung des Erben .....               | 413     |
| Untertitel 5 · Aufschiebende Einreden .....                                            | 515     |
| Titel 3 · Erbschaftsanspruch .....                                                     | 531     |
| Titel 4 · Mehrheit von Erben                                                           |         |
| Untertitel 1 · Rechtsverhältnis der Erben untereinander .....                          | 707     |
| Untertitel 2 · Rechtsverhältnis zwischen den Erben und<br>den Nachlassgläubigern ..... | 943     |
| Sachregister .....                                                                     | 1043    |

---

\* Zitiert wird nicht nach Seiten, sondern  
nach Paragraph bzw Artikel und Randnummer;  
siehe dazu auch „Zitierweise“.
